# Supplementary material
Source: publisher site journal article supplement (https://www.dovepress.com/get_supplementary_file.php?f=353168.docx)
Supplement: Supplementary file 1 [file get_supplementary_file.php]

| **Appointment 1 (Thursday, May)** | | | | **Appointment 2**  **(Monday, August)** | | | **Appointment 6  (Thursday, October)** | | |
| --- | --- | --- | --- | --- | --- | --- | --- | --- | --- |
| **Person** | **Salivary amylase [U/ml]** | | | **Salivary amylase [U/ml]** | | | **Salivary amylase [U/ml]** | | |
| **Before intervention** | **After intervention** | **Fold change** | **Before intervention** | **After intervention** | **Fold change** | **Before intervention** | **After intervention** | **Fold change** |
| A | 114.95 | 280.42 | 2.44 | 73.6 | 81.0 | 1.10 | 101.27 | 170.69 | 1.69 |
| B | 206.61 | 543.63 | 2.63 | - | - | - | 115.96 | 118.49 | 1.02 |
| C | 61.65 | 182.10 | 2.95 | 115.6 | 129.3 | 1.12 | 85.36 | 134.09 | 1.57 |
| D | 50.13 | 101.75 | 2.03 | 77.2 | 40.5 | 0.52 | 14.72 | 20.40 | 1.39 |
| E | 99.79 | 255.91 | 2.56 | 146.8 | 218.7 | 1.49 | 320.91 | 143.40 | 0.45 |
| F | 79.40 | 254.41 | 3.20 | 53.6 | 79.3 | 1.48 | 115.88 | 70.03 | 0.60 |
| G | 69.78 | 161.36 | 2.31 | 58.8 | 119.5 | 2.03 | 96.97 | 98.64 | 1.02 |
| H | 155.04 | 340.27 | 2.19 | 192.3 | 394.6 | 2.05 | 207.11 | 354.72 | 1.71 |
| I | 74.38 | 439.68 | 5.91 | 51.6 | 165.6 | 3.21 | 66.93 | 135.73 | 2.03 |
| J | 86.62 | - | - | 131.8 | 415.3 | 3.15 | 75.14 | 233.98 | 3.11 |
| K | 113.70 | 489.45 | 4.30 | 291.2 | 359.1 | 1.23 | - | - | - |
| L | **-** | - | **-** | 51.6 | 184.4 | 3.57 | - | - | - |

**Supplementary materials**

**Supplementary Table 1** Individual salivary α-amylase levels in study persons

**Supplementary Table 2** α-amylase activities before intervention and fold change during intervention arranged from the highest to smallest

| **α-amylase activity (U/ml) before intervention** | | | | | | **α-amylase activity (U/ml) fold change during intervention** | | | | | |
| --- | --- | --- | --- | --- | --- | --- | --- | --- | --- | --- | --- |
| **Appointment 1** | | **Appointment 2** | | **Appointment 6** | | **Appointment 1** | | **Appointment 2** | | **Appointment 6** | |
| Person | α-amyl. | Person | α-amyl. | Person | α-amyl. | Person | Fold change | Person | Fold change | Person | Fold change |
| B | 206.61 | K | 291.2 | E | 320.91 | I | 5.91 | L | 3.57 | J | 3.11 |
| H | 155.04 | H | 192.3 | H | 207.11 | K | 4.30 | I | 3.21 | I | 2.03 |
| A | 114.95 | E | 146.8 | B | 115.96 | F | 3.20 | J | 3.15 | H | 1.71 |
| K | 113.70 | J | 131.8 | F | 115.88 | C | 2.95 | H | 2.05 | A | 1.69 |
| E | 99.79 | C | 115.6 | A | 101.27 | B | 2.63 | G | 2.03 | C | 1.57 |
| J | 86.62 | D | 77.2 | G | 96.97 | E | 2.56 | E | 1.49 | D | 1.39 |
| F | 79.40 | A | 73.6 | C | 85.36 | A | 2.44 | F | 1.48 | B | 1.02 |
| I | 74.38 | G | 58.8 | J | 75.14 | G | 2.31 | K | 1.23 | G | 1.02 |
| G | 69.78 | F | 53.6 | I | 66.93 | H | 2.19 | C | 1.12 | F | 0.60 |
| C | 61.65 | I | 51.6 | D | 14.72 | D | 2.03 | A | 1.10 | E | 0.45 |
| D | 50.13 | L | 51.6 | K | - | J | - | D | 0.52 | K | - |
|  |  | B | - |  |  |  |  | B |  |  |  |

| **Appointment 1 (Thursday, May)** | | | | **Appointment 2**  **(Monday, August)** | **Appointment 6  (Thursday, October)** | | | **Reference without intervention (August)** | | |
| --- | --- | --- | --- | --- | --- | --- | --- | --- | --- | --- |
| **Person** | **Salivary cortisol [pg/ml]** | | | **Saliv. cort. [pg/ml]** | **Salivary cortisol [pg/ml]** | | | **Salivary cortisol [pg/ml]** | | |
| **Inter-vention day** | **One day after** | **Two days after** | **Intervention day** | **Inter-vention day** | **One day after** | **Two days after** | **Thursday** | **Friday** | **Saturday** |
| A | 239.28 | 673.22 | 363.67 | - | 290.70 | 882.71 | 253.06 | - | - | 276.00 |
| B | 106.88 | 76.66 | 136.48 | - | 88.31 | 3377.90 | 1152.45 | - | - | - |
| C | 306.27 | 325.09 | 192.48 | 135.86 | 204.89 | 230.36 | 453.55 | 292.14 | 659.86 | 517.54 |
| D | 144.32 | 217.62 | 318.21 | - | 418.37 | 402.12 | 5876.64 | 210.47 | 588.23 | 1015.77 |
| E | 543.00 | 282.13 | 1077.53 | 368.53 | 282.25 | 840.70 | 389.84 | 335.18 | 1004.12 | 533.95 |
| F | 223.13 | 267.69 | 231.23 | 192.21 | 226.42 | 158.74 | 164.84 | 282.50 | 718.50 | 181.28 |
| G | 350.01 | 1193.56 | 760.47 | 1319.95 | 424.82 | 259.12 | 217.93 | 480.70 | 591.99 | 883.54 |
| H | 169.69 | 301.29 | 276.53 | 159.48 | 12617.10 | 670.54 | 3678.59 | 196.60 | 156.58 | 355.69 |
| I | 247.32 | 552.12 | 2627.39 | 279.63 | 649.66 | 511.09 | 2104.74 | 204.38 | 468.14 | 152.93 |
| J | 258.08 | 136.51 | 292.23 | 516.58 | 345.17 | 171.50 | 290.52 | 141.71 | 142.09 | 159.00 |
| K | 76.63 | 66.20 | 60.99 | 68.76 | 221.25 | 76.04 | 328.94 | 243.23 | 71.20 | 152.00 |
| L | **-** | - | **-** | 753.95 | - | - | - | 644.21 | 1099.15 | 607 |

**Supplementary Table 3** Individual salivary cortisol levels in study persons

**Notes:** In appointment 2 salivary samples were collected only on the day of intervention. The values varied in all interventions from 61 pg/ml to 12617 pg/ml, average being 646 ± 1409 pg/ml and median 291 pg/ml. Weekday averages and medians range from 422 ± 400 pg/ml (average) and 280 pg/ml (median) on Monday to an average 790 ± 1200 pg/ml on Saturday and a median 364 pg/ml on Friday.

**Supplementary table 4** Scoring for sleep time recovery and stress-recovery ratio on intervention days and on two consecutive days

| **Appointment 1 (Thursday, May)** | | | | | | | **Appointment 6 (Thursday, October)** | | | | | |
| --- | --- | --- | --- | --- | --- | --- | --- | --- | --- | --- | --- | --- |
|  |
| **Person** | **Sleep time recovery scores** | | | **Stress-recovery ratio scores** | | | **Sleep time recovery scores** | | | **Stress-recovery ratio scores** | | |  |
| **Inter-vention day** | **One day after** | **Two days after** | **Inter-vention day** | **One day after** | **Two days after** | **Inter-vention day** | **One day after** | **Two days after** | **Inter-vention day** | **One day after** | **Two days after** |  |
| A | 48 | 32 | 100 | 61 | 22 | 73 | 50 | 45 | 37 | 27 | 25 | 23 |  |
| B | 17 | 23 | 33 | 23 | 20 | 42 | 56 | 38 | 52 | 36 | 19 | 69 |  |
| C | 72 | 55 | 40 | 46 | 45 | 29 | 36 | 36 | 27 | 16 | 12 | 13 |  |
| D | 19 | 39 | 44 | 25 | 33 | 54 | 13 | 43 | 57 | 5 | 39 | 29 |  |
| E | 30 | - | - | 33 | - | - | - | - | - | - | - | - |  |
| F | 11 | 32 | 53 | 10 | 74 | 86 | 58 | 12 | 33 | 99 | 40 | 16 |  |
| G | - | 19 | 19 | - | 29 | - | 12 | - | 41 | 3 | 13 | 20 |  |
| H | 19 | - | 14 | 7 | - | 4 | 13 | 21 | 14 | 10 | 15 | 10 |  |
| I | 72 | 96 | - | 100 | 100 | - | 58 | 84 | 89 | 100 | 100 | 99 |  |
| J | 54 | 94 | 75 | 45 | 100 | 98 | 88 | 33 | 98 | 69 | 16 | 97 |  |
| K | 32 | 35 | - | 24 | 29 | - | 38 | 19 | 53 | 21 | 25 | 34 |  |
| L |  |  |  |  |  |  |  |  |  |  |  |  |  |
| Average | 37,4 | 47,2 | 47,3 | 37,4 | 50,2 | 55,1 | 42,2 | 36,8 | 50,1 | 38,6 | 30,4 | 41,0 |  |
| SD | 22,7 | 28,9 | 28,7 | 27,6 | 32,5 | 33,1 | 24,8 | 21,0 | 26,4 | 37,3 | 26,4 | 34,3 |  |
| Median | 31 | 35 | 42 | 29 | 33 | 54 | 44 | 36 | 46,5 | 24 | 22 | 26 |  |
| Range | 11 ̶ 72 | 19 ̶ 96 | 14 ̶ 100 | 7 ̶ 100 | 20 ̶ 100 | 4 ̶ 98 | 12 ̶ 88 | 12 ̶ 84 | 14 ̶ 98 | 3 ̶ 100 | 12-100 | 13 ̶ 100 |  |
| **Notes:** 0-29 indicates low, 30-59 medium and 60-100 good recovery from stress. Average of sleep time recovery was 44 ± 25, median 39 and range 12-100. Average of stress-recovery ratio was 42 ± 32, median 31 and range 3-100. | | | | | | | | | | | | | |

**Supplementary Table 5** Parameter estimates and tests of the general linear mixed effects’ models for sleep and recovery

| Variable | Coefficient | Std.err. | df | t / chi-squared | p |
| --- | --- | --- | --- | --- | --- |
| **Model 3: Sleep** R2 (marginal) = 4.24 %; R2 (conditional) = 55.64 % | | | | | |
| Fixed effects |  |  |  |  |  |
| Intercept | 3.462 | 0.189 | 33 | 20.450 | < 0.001 |
| Day of week (ref. Thursday) | - | - | 2 | 4.935 | 0.085 |
| - Friday | 0.054 | 0.149 | 33 | 0.362 | 0.720 |
| - Saturday | 0.302 | 0.140 | 33 | 2.149 | 0.039 |
| Random effects |  |  |  |  |  |
| Subject (i.e. person, variance) | 0.211 |  |  |  |  |
| Month (variance) | 1.828e -9 |  |  |  |  |
| Residual (variance) | 0.182 |  |  |  |  |
| AR1, phi | -0.154 |  |  |  |  |
|  |  |  |  |  |  |
|  |  |  |  |  |  |
| **Model 4: Recovery** R2 (marginal) = 2.70 %; R2 (conditional) = 46.91 % | | | | | |
| Intercept | 3.531 | 0.229 | 35 | 15.392 | < 0.001 |
| Month (ref. May) | - | - | 1 | 2.912 | 0.088 |
| - October | 0.294 | 0.193 | 9 | -1.525 | 0.162 |
| Subject (i.e. person, variance) | 0.358 |  |  |  |  |
| Month (variance) | 2.815e -9 |  |  |  |  |
| Residual (variance) | 0.430 |  |  |  |  |
| AR1, phi | 0.137 |  |  |  |  |

**Notes**: Std.err. denotes the standard error of the estimates, t- and chi-squared values are the test values for the parameter estimates or likelihood ratio tests for the categorical variables, df denotes the degrees of freedom. R2 – values were presented for the marginal and conditional models.

**Supplementary Table 6** A comparison of pre- and post-test results in self-reported questionnaires

|  | n | Pre-Mean (SD) | Post-Mean (SD) | p |
| --- | --- | --- | --- | --- |
| Pain | 7 | 31 (14) | 27 (20) | 0.523 |
| BBI-15 | 8 | 41 (15) | 33 (10) | 0.231 |
